# Supplementary material
Source: ML conference proceedings conference paper supplement (https://aclanthology.org/D19-1237)
Supplement: Attachment [file D19-1237.Attachment.zip]

# Supplementary File for Uncover Sexual Harassment Patterns from Personal Stories by Joint Key Element Extraction and Categorization

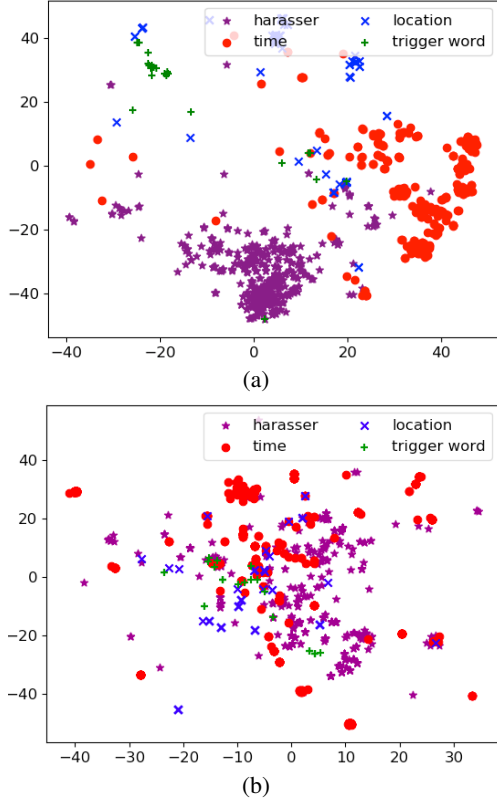

Figure 1: t-SNEs of word representations from the first layer of J-CNN (a) and from word embedding layer in classification only model (b).

| Age  | Single/<br>Multiple | Type of<br>Harasser | Loc  | Time | Key<br>Element |
|------|---------------------|---------------------|------|------|----------------|
| 0.84 | 0.84                | 0.79                | 0.71 | 0.91 | 0.75           |

Table 1: Inter-agreement Cohen's Kappa

| Classification   | Accuracy | macro F1 |
|------------------|----------|----------|
| Age              | <0.001   | <0.001   |
| Single/Multiple  | <0.005   | <0.005   |
| Type of Harasser | <0.05    | <0.05    |
| Type of location | <0.005   | <0.05    |
| Time             | <0.005   | <0.05    |

Table 2: Significance test p values on improvement from joint learning
